# Supplementary material for: Winternitz Signature Scheme Using Nonadjacent Forms
Source: Hindawi journal article supplement (doi:10.1155/2018/1452457), 2018-06-21
Supplement: f1 [file 1452457.f1.zip]

Archive with 12 entries (12 files):
- hash.c
- hash.h
- main.c
- Makefile
- params.h
- prg.c
- prg.h
- README.txt
- wss_b.c
- wss_b.h
- wss_n.c
- wss_n.h
