# Supplementary material for: Winternitz Signature Scheme Using Nonadjacent Forms
Source: Hindawi journal article supplement (doi:10.1155/2018/1452457), 2018-06-21
Supplement: f1 [file 1452457.f1.zip › hash.h]

#ifndef HASH_H
#define HASH_H

#include "params.h"

int msg_hash(unsigned char *out,const unsigned char *in,unsigned long long inlen);
int varlen_hash(unsigned char *out,const unsigned char *in,unsigned long long inlen);
int hash_n_n(unsigned char *out,const unsigned char *in);
int hash_n_n_mask(unsigned char *out,const unsigned char *in,const unsigned char *mask, unsigned char ftn_key[HASH_BYTES]);

#endif
