# Supplementary material for: Winternitz Signature Scheme Using Nonadjacent Forms
Source: Hindawi journal article supplement (doi:10.1155/2018/1452457), 2018-06-21
Supplement: f1 [file 1452457.f1.zip › Makefile]

CXX	= gcc
LDFLAGS = -lcrypto
CXXFLAGS= -march=native -mtune=native -O3


all: Makefile main.c
	rm -f *.o wss_n
	$(CXX) $(CXXFLAGS) $(IFLAGS) -c -o hash.o hash.c
	$(CXX) $(CXXFLAGS) $(IFLAGS) -c -o prg.o prg.c
	$(CXX) $(CXXFLAGS) $(IFLAGS) -c -o wss_b.o wss_b.c
	$(CXX) $(CXXFLAGS) $(IFLAGS) -c -o wss_n.o wss_n.c
	$(CXX) $(CXXFLAGS) $(IFLAGS) -c -o main.o main.c
	$(CXX) $(CXXFLAGS) $(IFLAGS) -o wss_n main.o hash.o prg.o wss_b.o wss_n.o $(LDFLAGS)

clean:
	rm -f *.o wss_n
