# Supplementary material for: Winternitz Signature Scheme Using Nonadjacent Forms
Source: Hindawi journal article supplement (doi:10.1155/2018/1452457), 2018-06-21
Supplement: f1 [file 1452457.f1.zip › prg.h]

#ifndef PRG_H
#define PRG_H

#include "params.h"

void prg(unsigned char *r, unsigned long long rlen, const unsigned char key[SEED_BYTES]);

#endif
