# Supplementary material for: Winternitz Signature Scheme Using Nonadjacent Forms
Source: Hindawi journal article supplement (doi:10.1155/2018/1452457), 2018-06-21
Supplement: f1 [file 1452457.f1.zip › README.txt]

[Benchmark source codes for WSS-B and WSS-N]
--------------------------------------------
This is the software benchmarking two hash-based signature schemes WSS-B and WSS-N, and it requires Openssl library
The theoretical details are in the paper "Winternitz signature scheme using non-adjacent forms"
The paper will soon appear in Security and Communication Networks.

The software consists of three main components:

- main.c : The main function gives the average run times of the key generations, the signature generations and the signature verifications of WSS-B and WSS-N in cpu cycles.
	   It gives the average run times by iterating 100,000 times.
	   You may control the number of iterations.

- wss_b.c, wss_n.c : Each contains the core algorithms of the signature schemes WSS-B and WSS-N.
                     WSS-B codes are from Supercop project(https://bench.cr.yp.to/supercop.html).

- hash.c, prg.c, params.h : It defines other algorithms and variables required for the signature schemes.
                            Some codes are from Supercop project.

[How to use the code]
---------------------
1. FOR BUILD
> make

2. FOR EXECUTE
> ./wss_n

[Contact]
---------
In case you have any questions or suggestions, please contact us.
green86@nsr.re.kr, dyroh@nsr.re.kr
